# Supplementary material for: Breaking Dense Integration Limits: Inverse-Designed Lithium Niobate Multimode Photonic Circuits
Source: Research Square preprint supplement (doi:10.21203/rs.3.rs-7481144/v1), 2025-09-03
Supplement: Supplementary file 1 [file 91b1adc3185f2a5014d4a527.docx]

**Breaking Dense Integration Limits: Inverse-Designed Lithium Niobate Multimode Photonic Circuits**

*Xu Han1,2*†*, Hu Jiang1*†*, Jie He1, Zixu Zhu1, Jiahui Su1, Mei Xian Low2, Yongheng Jiang3, Yu He4, Lantian Feng5, Thach. G. Nguyen2, Andreas Boes6, Chengliang Pan1, Guanghui Ren2,*, Yong Zhang4, Xifeng Ren5, Yonghui Tian3,*, Arnan Mitchell2, and Haojie Xia1,**

*1 School of Instrument Science and Opto-electronics Engineering, Hefei University of Technology, Hefei 230009, China*

*2 Integrated Photonics and Applications Centre (InPAC), School of Engineering, RMIT University, Melbourne, VIC 3001, Australia*

*3 School of Physical Science and Technology, Lanzhou University, Lanzhou 730000, Gansu, China*

*4 State Key Laboratory of Advanced Optical Communication Systems and Networks, Shanghai Jiao Tong University, Shanghai 200240, China*

*5 Laboratory of Quantum Information, University of Science and Technology of China, Hefei 230026, China*

*6 School of Electrical and Mechanical Engineering, The University of Adelaide, Adelaide, SA 5005, Australia*

†*These**authors contribute equally to this work*

*Email:* [*guanghui.ren@rmit.edu.au*](mailto:guanghui.ren@rmit.edu.au)*;* [*tianyh@lzu.edu.cn*](mailto:tianyh@lzu.edu.cn)*;* [*hjxia@hfut.edu.cn*](mailto:hjxia@hfut.edu.cn)*;*

***Abstract***

In this supporting information, we present a structural and performance comparison between inverse-designed mode (de)multiplexers (MUXs) with 100 nm and 200 nm feature sizes (S1), the design and measured results of traditional directional coupler (DC)-based MUXs (S2), the measured results of multimode waveguide crossing when light propagates along the crystallographic Z-axis of lithium niobate (S3), the detailed inverse design method (S4) and the schematic diagram of experiment setup (S5).

***S1. Inverse-designed mode (de)multiplexers with different feature sizes***

The 2D schematic diagrams of inverse-designed mode (de)multiplexers (MUXs) with different feature sizes are shown in **Fig. S1a**. The effective sizes of the devices are both designed as 19×25 μm2. The corresponding scanning electron microscope (SEM) images are shown in **Fig. S1b**. It can be seen that the designed and fabricated device structure is much more complex when 100 nm feature size is allowed.


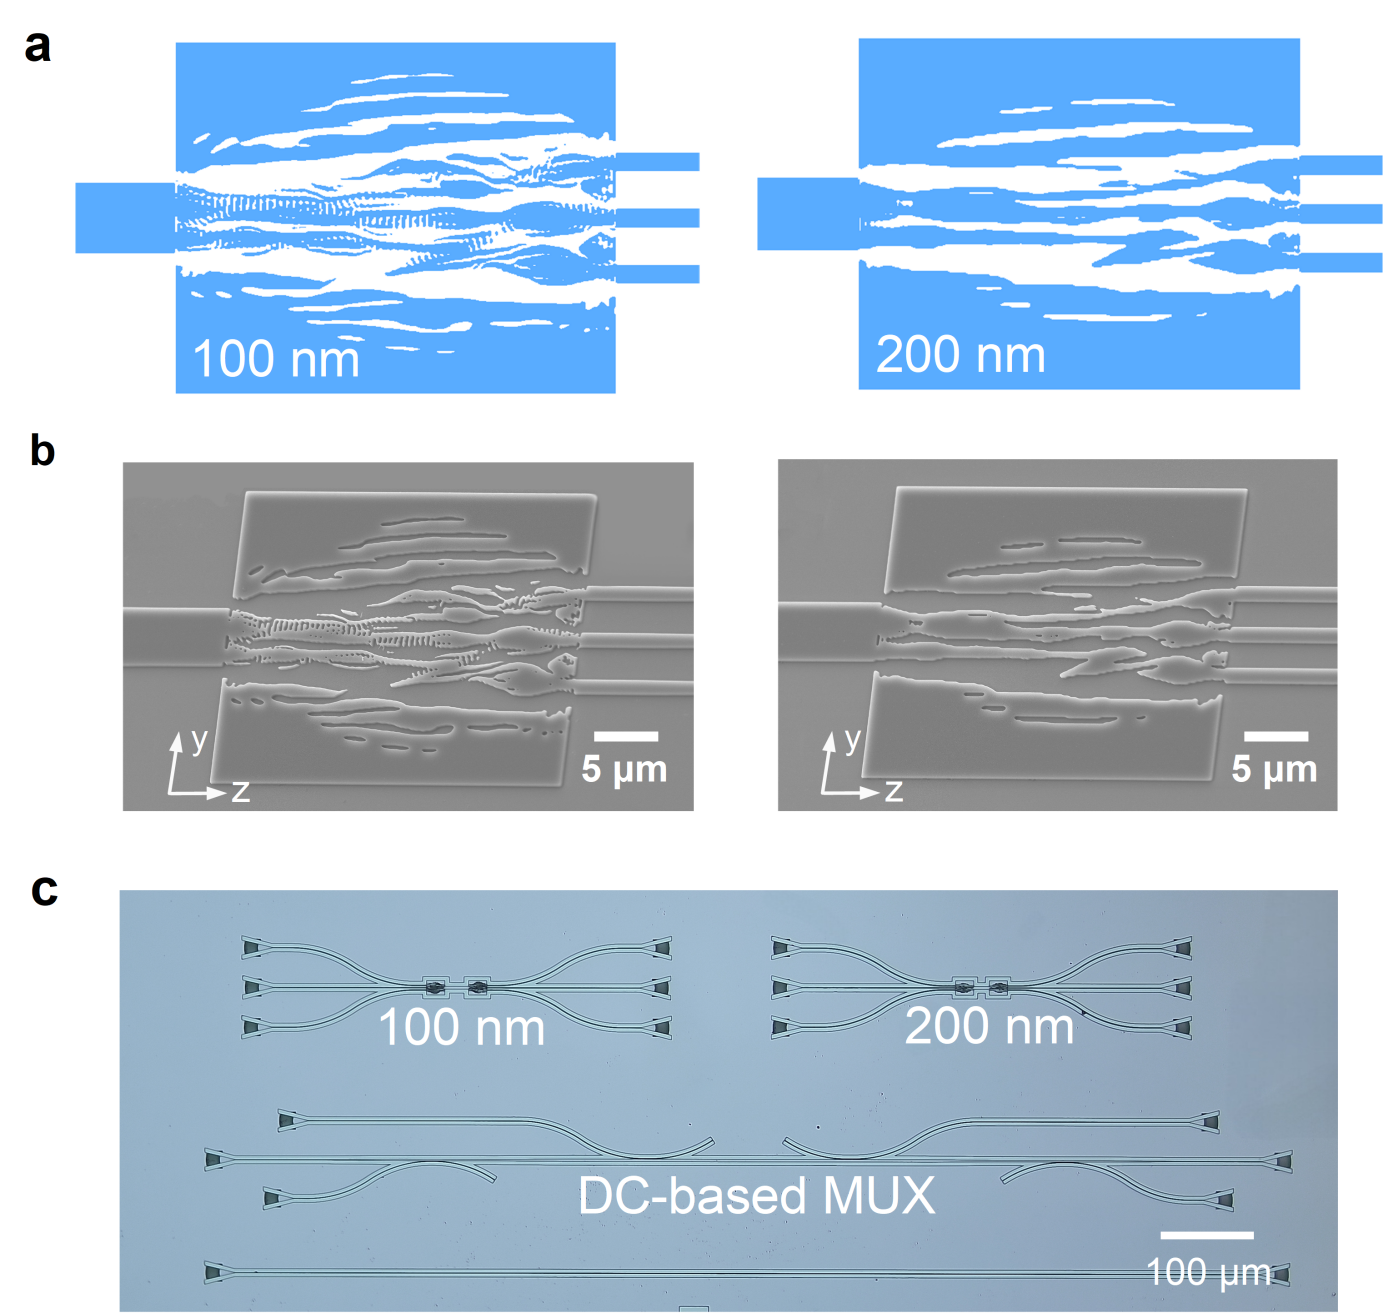


**Fig. S1** **Structural comparison between MUXs with 100 nm and 200 nm feature sizes. a** 2D schematic diagrams of the inverse-designed MUXs. **b** SEM images of the fabricated MUXs. **c** Microscope image of the cascaded devices for transmission spectra measurements.

For the convenience of comparison, we also simulated and measured the transmission spectra of MUXs when the device feature size is limited to 200 nm. The simulated transmission spectra at a wavelength range from 1530 nm to 1570 nm are depicted as **Fig. S2a-c**. The simulated insertion losses (IL) of the TE0, TE1 and TE2 modes are 1.24 dB, 1.07 dB, and 1.87 dB at the wavelength of 1550 nm, while the mode crosstalk (CT) stays below -12.9 dB in the whole wavelength range. To confirm the device performance, the transmission spectra of different modes are measured by using the device shown in **Fig. S1c**. As shown in **Fig. S2d-f**, the measured IL of TE0, TE1, and TE2 mode channels are 3.13 dB, 2.62 dB, and 3.78 dB at the wavelength of 1550 nm, while the CT is lower than -10.7 dB in the whole wavelength range.


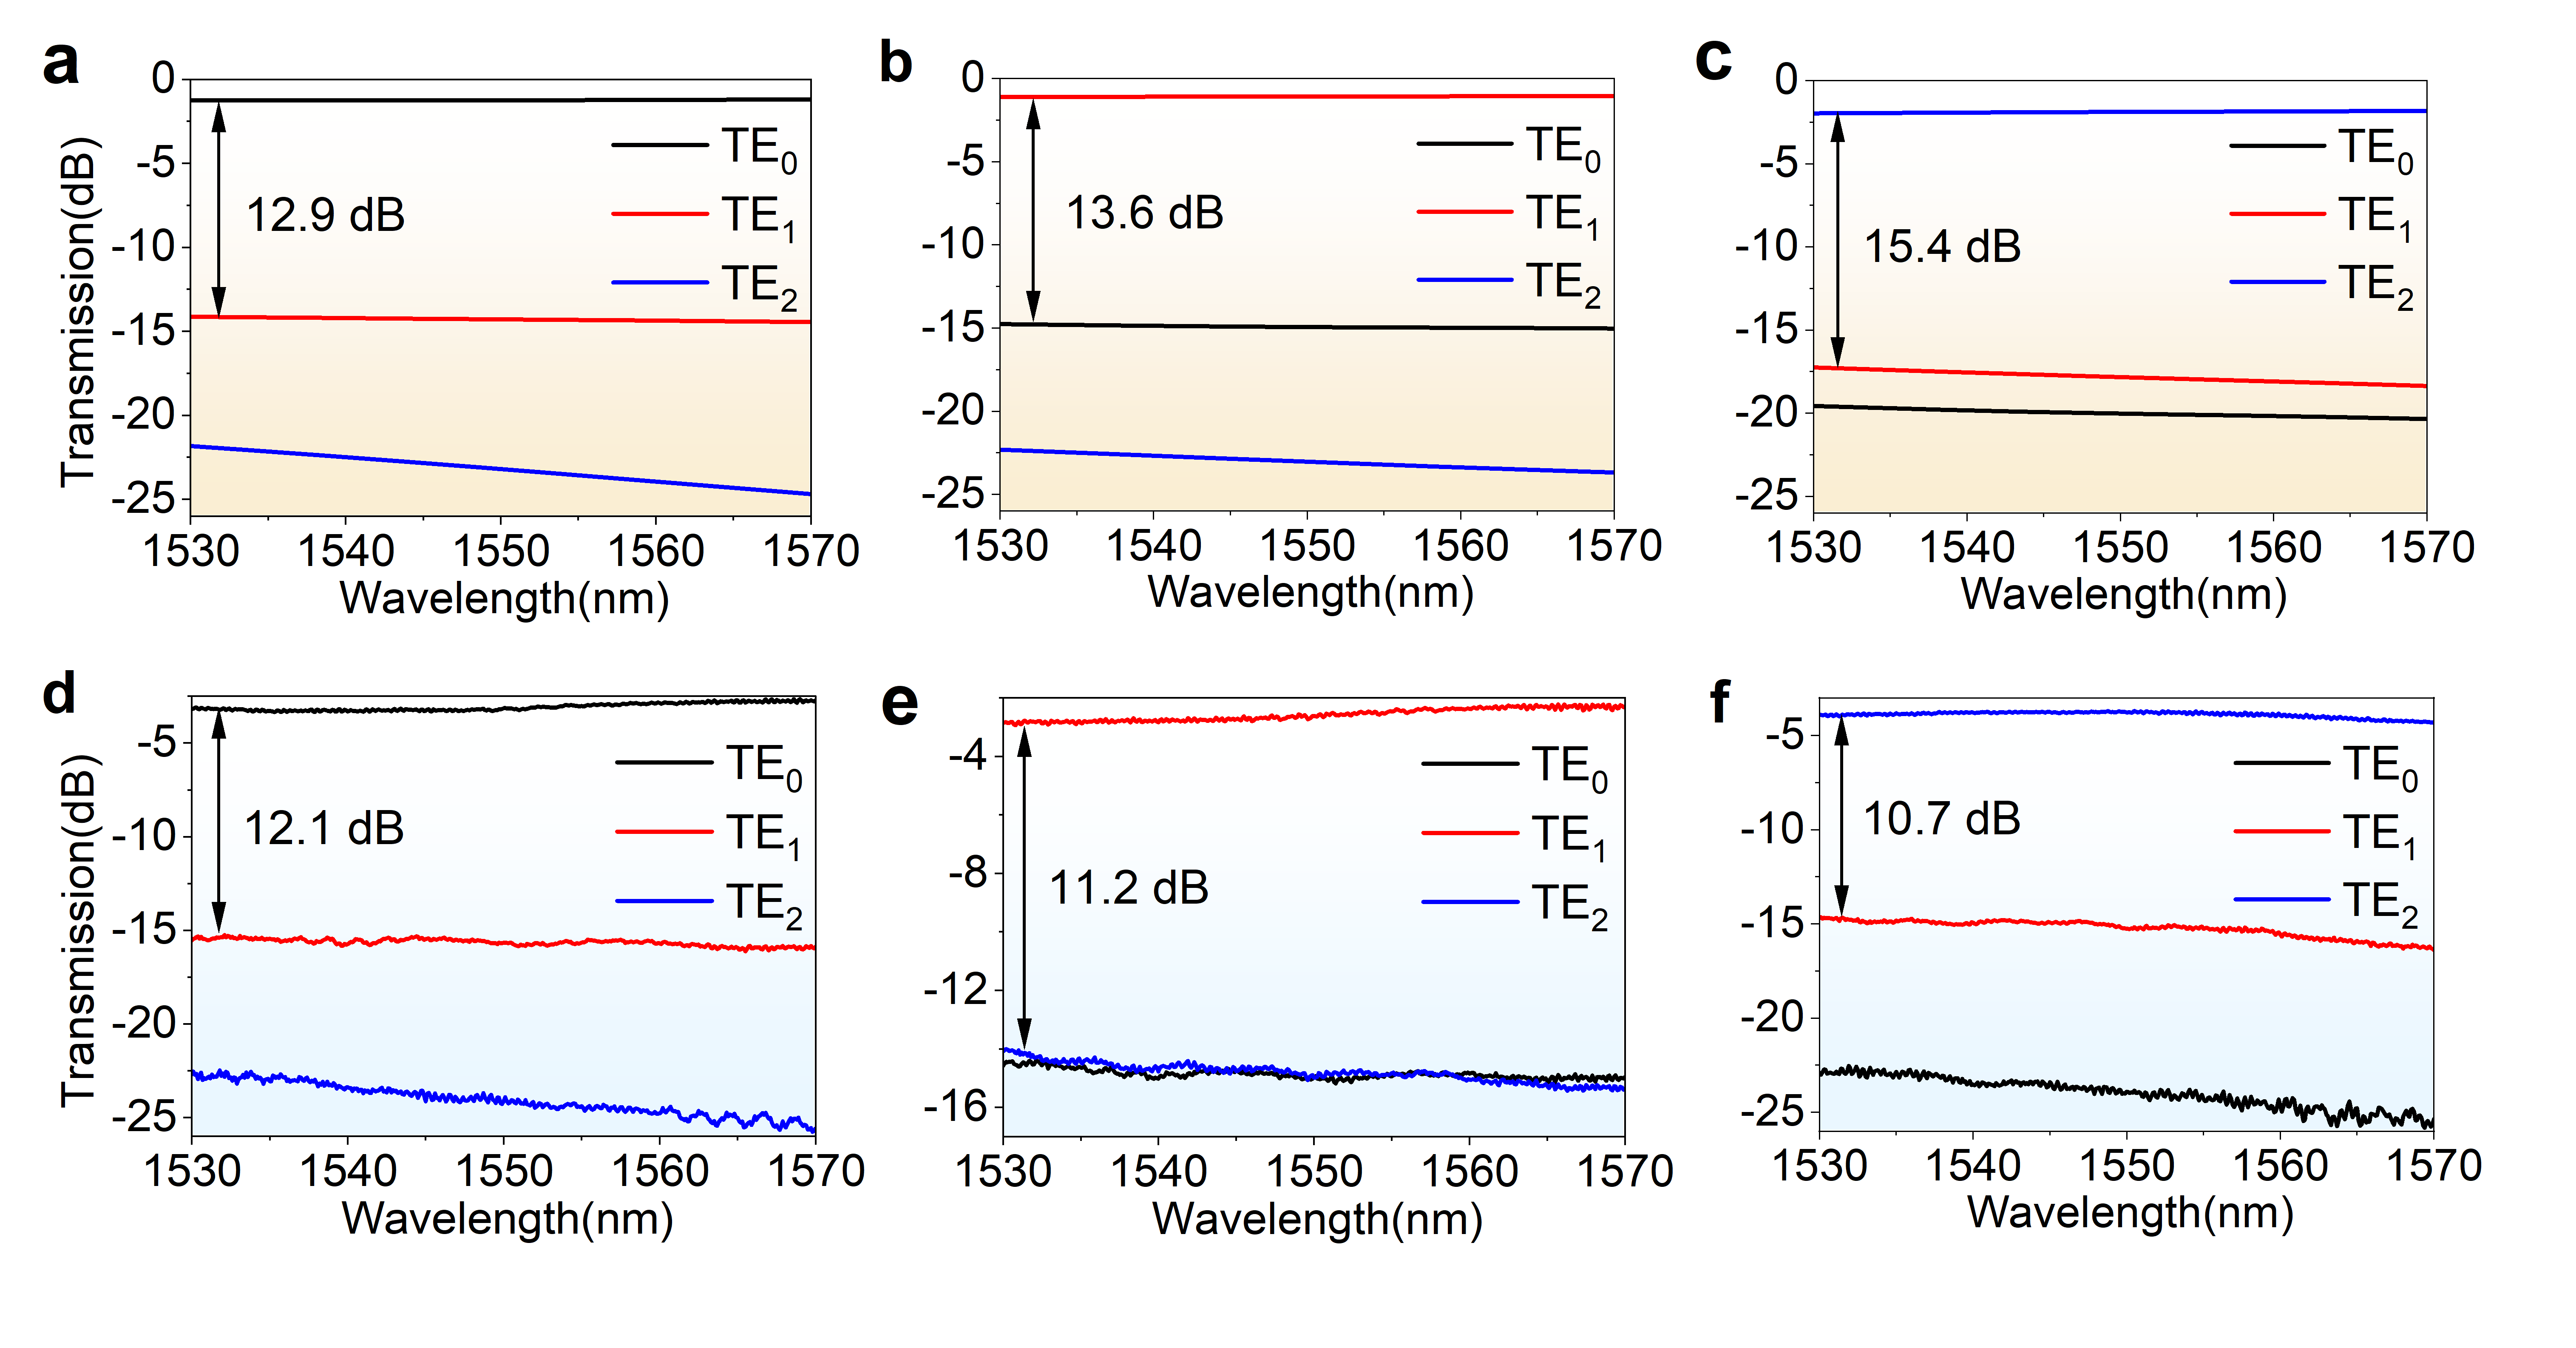


**Fig. S2** **Transmission spectra of MUXs with 200 nm feature size. a-c** 3D-FDTD simulation results (from left to right: TE0, TE1, TE2). **d-f** Experimental results.

We compare the device performance of MUXs with different feature sizes, as shown in **Table S1**. Once the minimum feature size is reduced, an overall improvement of device performance is obtained. By considering the limitations of LNOI device feature size (typically ≥200 nm) from direct etching process, a silicon nitride-lithium niobate hybrid platform with small and well-controlled feature size (≤100 nm) is expected to significantly improve the device performance including IL and CT.

**Table S1.** **Device performance comparison between MUXs with different feature sizes**

| **Device** | **IL-TE0** | **IL-TE1** | **IL-TE2** | **CT** |
| --- | --- | --- | --- | --- |
| 200 nm MUX | 3.13 dB | 2.62 dB | 3.78 dB | < -10.7 dB |
| **100 nm MUX**  **(This work)** | **1.05 dB** | **1.42 dB** | **2.50 dB** | **< -15.9 dB** |

***S2. Design and measured results of traditional DC-based MUXs***

We characterize the waveguide crossing and bend by using the traditional DC-based MUXs. A 2D view of the DC-based MUXs is shown in **Fig. S3a**, while the microscope image of the fabricated device is shown in **Fig. S3b**.

For Y-propagating waveguides, the widths of input and output single-mode waveguides are designed as *w*0=1.2 μm. To satisfy the phase matching condition, the waveguide widths for coupling TE1 and TE2 modes are designed as *w*1=2.84 μm and *w*2=4.48 μm. The corresponding coupling lengths are *L*1= 28 μm and *L*2= 38 μm, while the coupling gaps are *g*=200 nm. The measured transmission spectra are shown in **Fig. S4a-c**. The measured insertion losses of the TE0, TE1 and TE2 modes are 0.30 dB, 1.21 dB and 0.88 dB at the wavelength of 1550 nm, while the mode crosstalk stays below -17.8 dB in the whole wavelength range.

For Z-propagating waveguides, the widths of input and output single-mode waveguides are designed as *w*0=0.8 μm. The waveguide widths for coupling TE1 and TE2 modes are designed as *w*1=2.16 μm and *w*2=3.54 μm. The corresponding coupling lengths are *L*1= 4 μm and *L*2= 12 μm, while the coupling gaps are *g*=200 nm. The measured transmission spectra are shown in **Fig. S4d-f**. The measured insertion losses of the TE0, TE1 and TE2 modes are 0.82 dB, 1.47 dB and 1.78 dB at the wavelength of 1550 nm, while the mode crosstalk stays below -17.2 dB in the whole wavelength range.

***
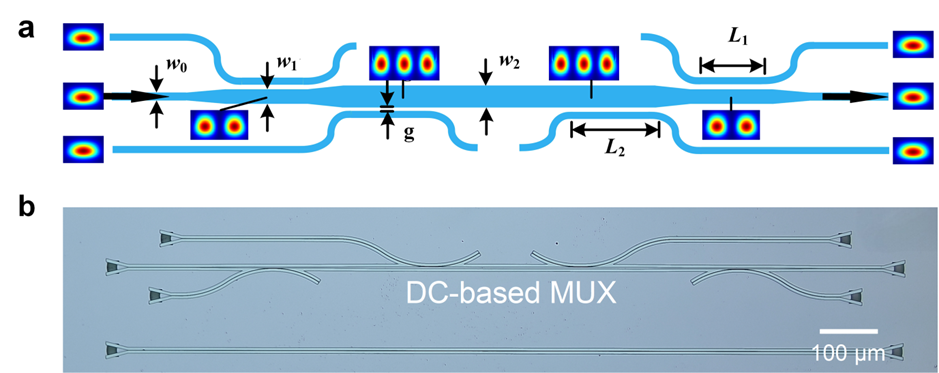
***

**Fig. S3** **Design oftraditional DC-based MUX. a** Schematic diagram of DC-based MUX. **b** Microscope image of the fabricated DC-based MUX.


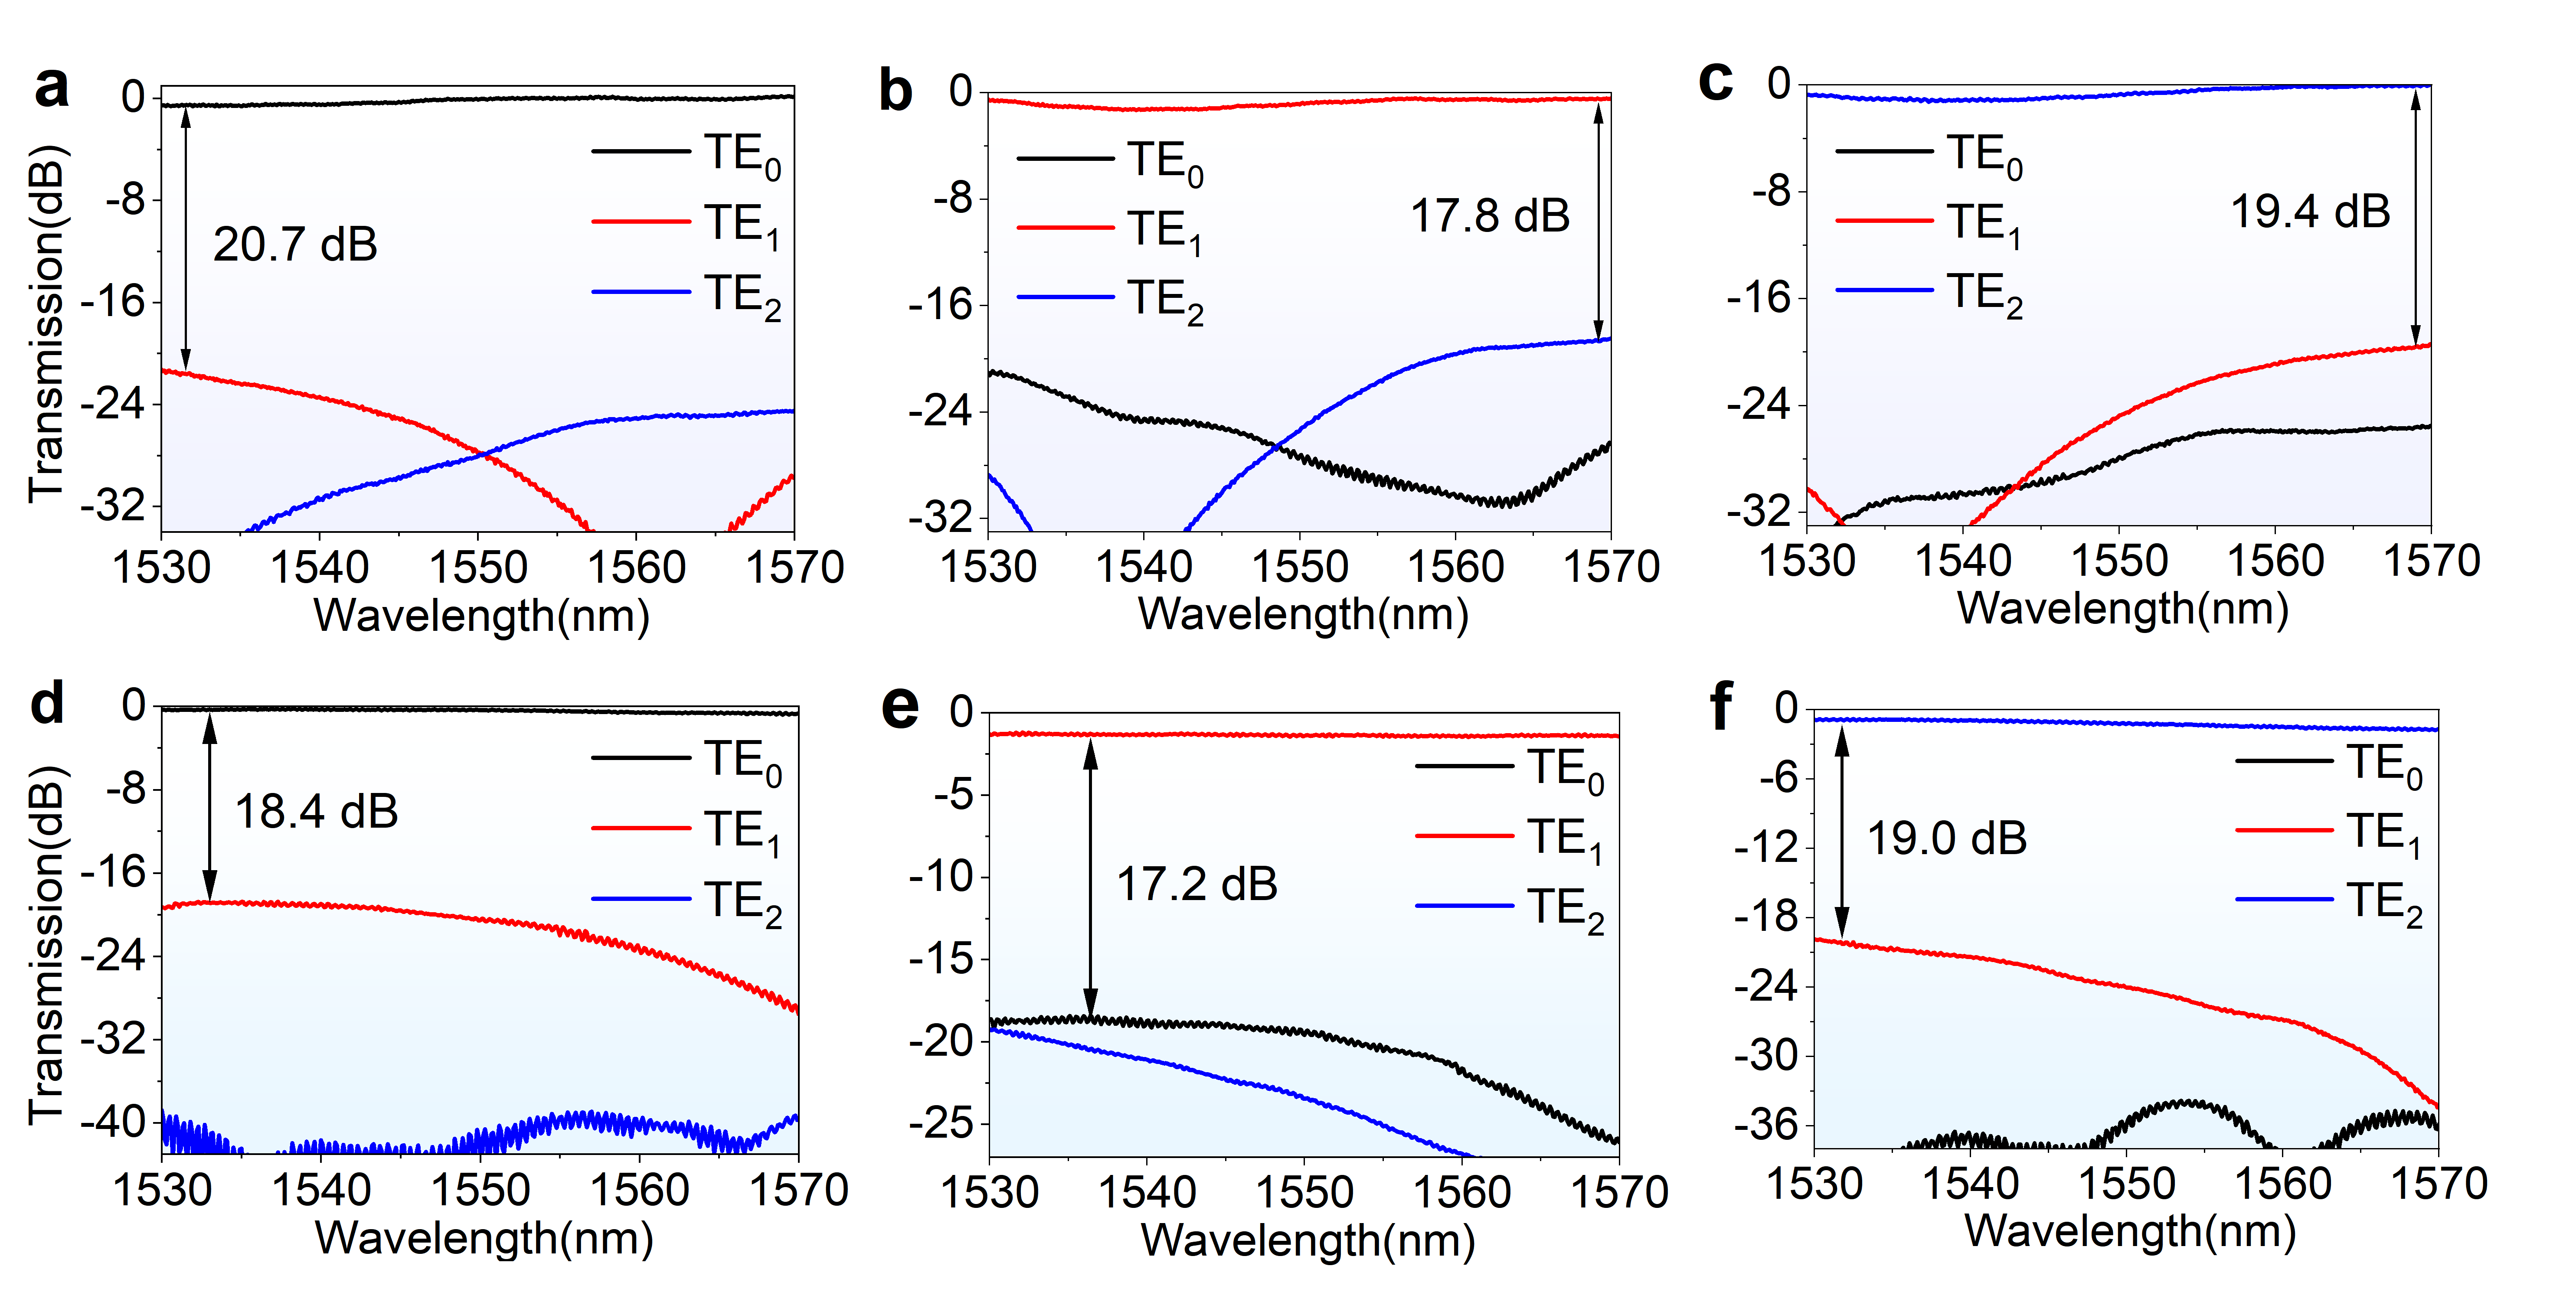


**Fig. S4** **Measured transmission spectra of DC-based MUX (from left to right: TE0, TE1, TE2). a-c** DC-basedMUX along the crystallographic Y-axis of lithium niobate. **d-f** DC-basedMUX along the crystallographic Z-axis of lithium niobate.

We also compare the device performance including effective size, IL and CT of DC-based MUX with that of our inverse-designed MUX, as shown in **Table S2**. The inverse-designed MUX exhibits comparable performance with the conventional counterparts based on directional couplers, while representing a more than tenfold footprint reduction.

**Table S2.** **Device performance comparison between forward- and inverse-designed MUXs**

| **Device** | **Effective size** | **TE0** | **TE1** | **TE2** | **Crosstalk** |
| --- | --- | --- | --- | --- | --- |
| DC-based MUX (Y) | 18×430 μm2 | 0.30 dB | 1.21 dB | 0.88 dB | < -17.8 dB |
| DC-based MUX (Z) | 18×347 μm2 | 0.82 dB | 1.47 dB | 1.78 dB | < -17.2 dB |
| **Inverse-designed MUX** | **19×25 μm2** | **1.05 dB** | **1.42 dB** | **2.50 dB** | **< -15.9 dB** |

***S3. Measured results of multimode waveguide crossing***


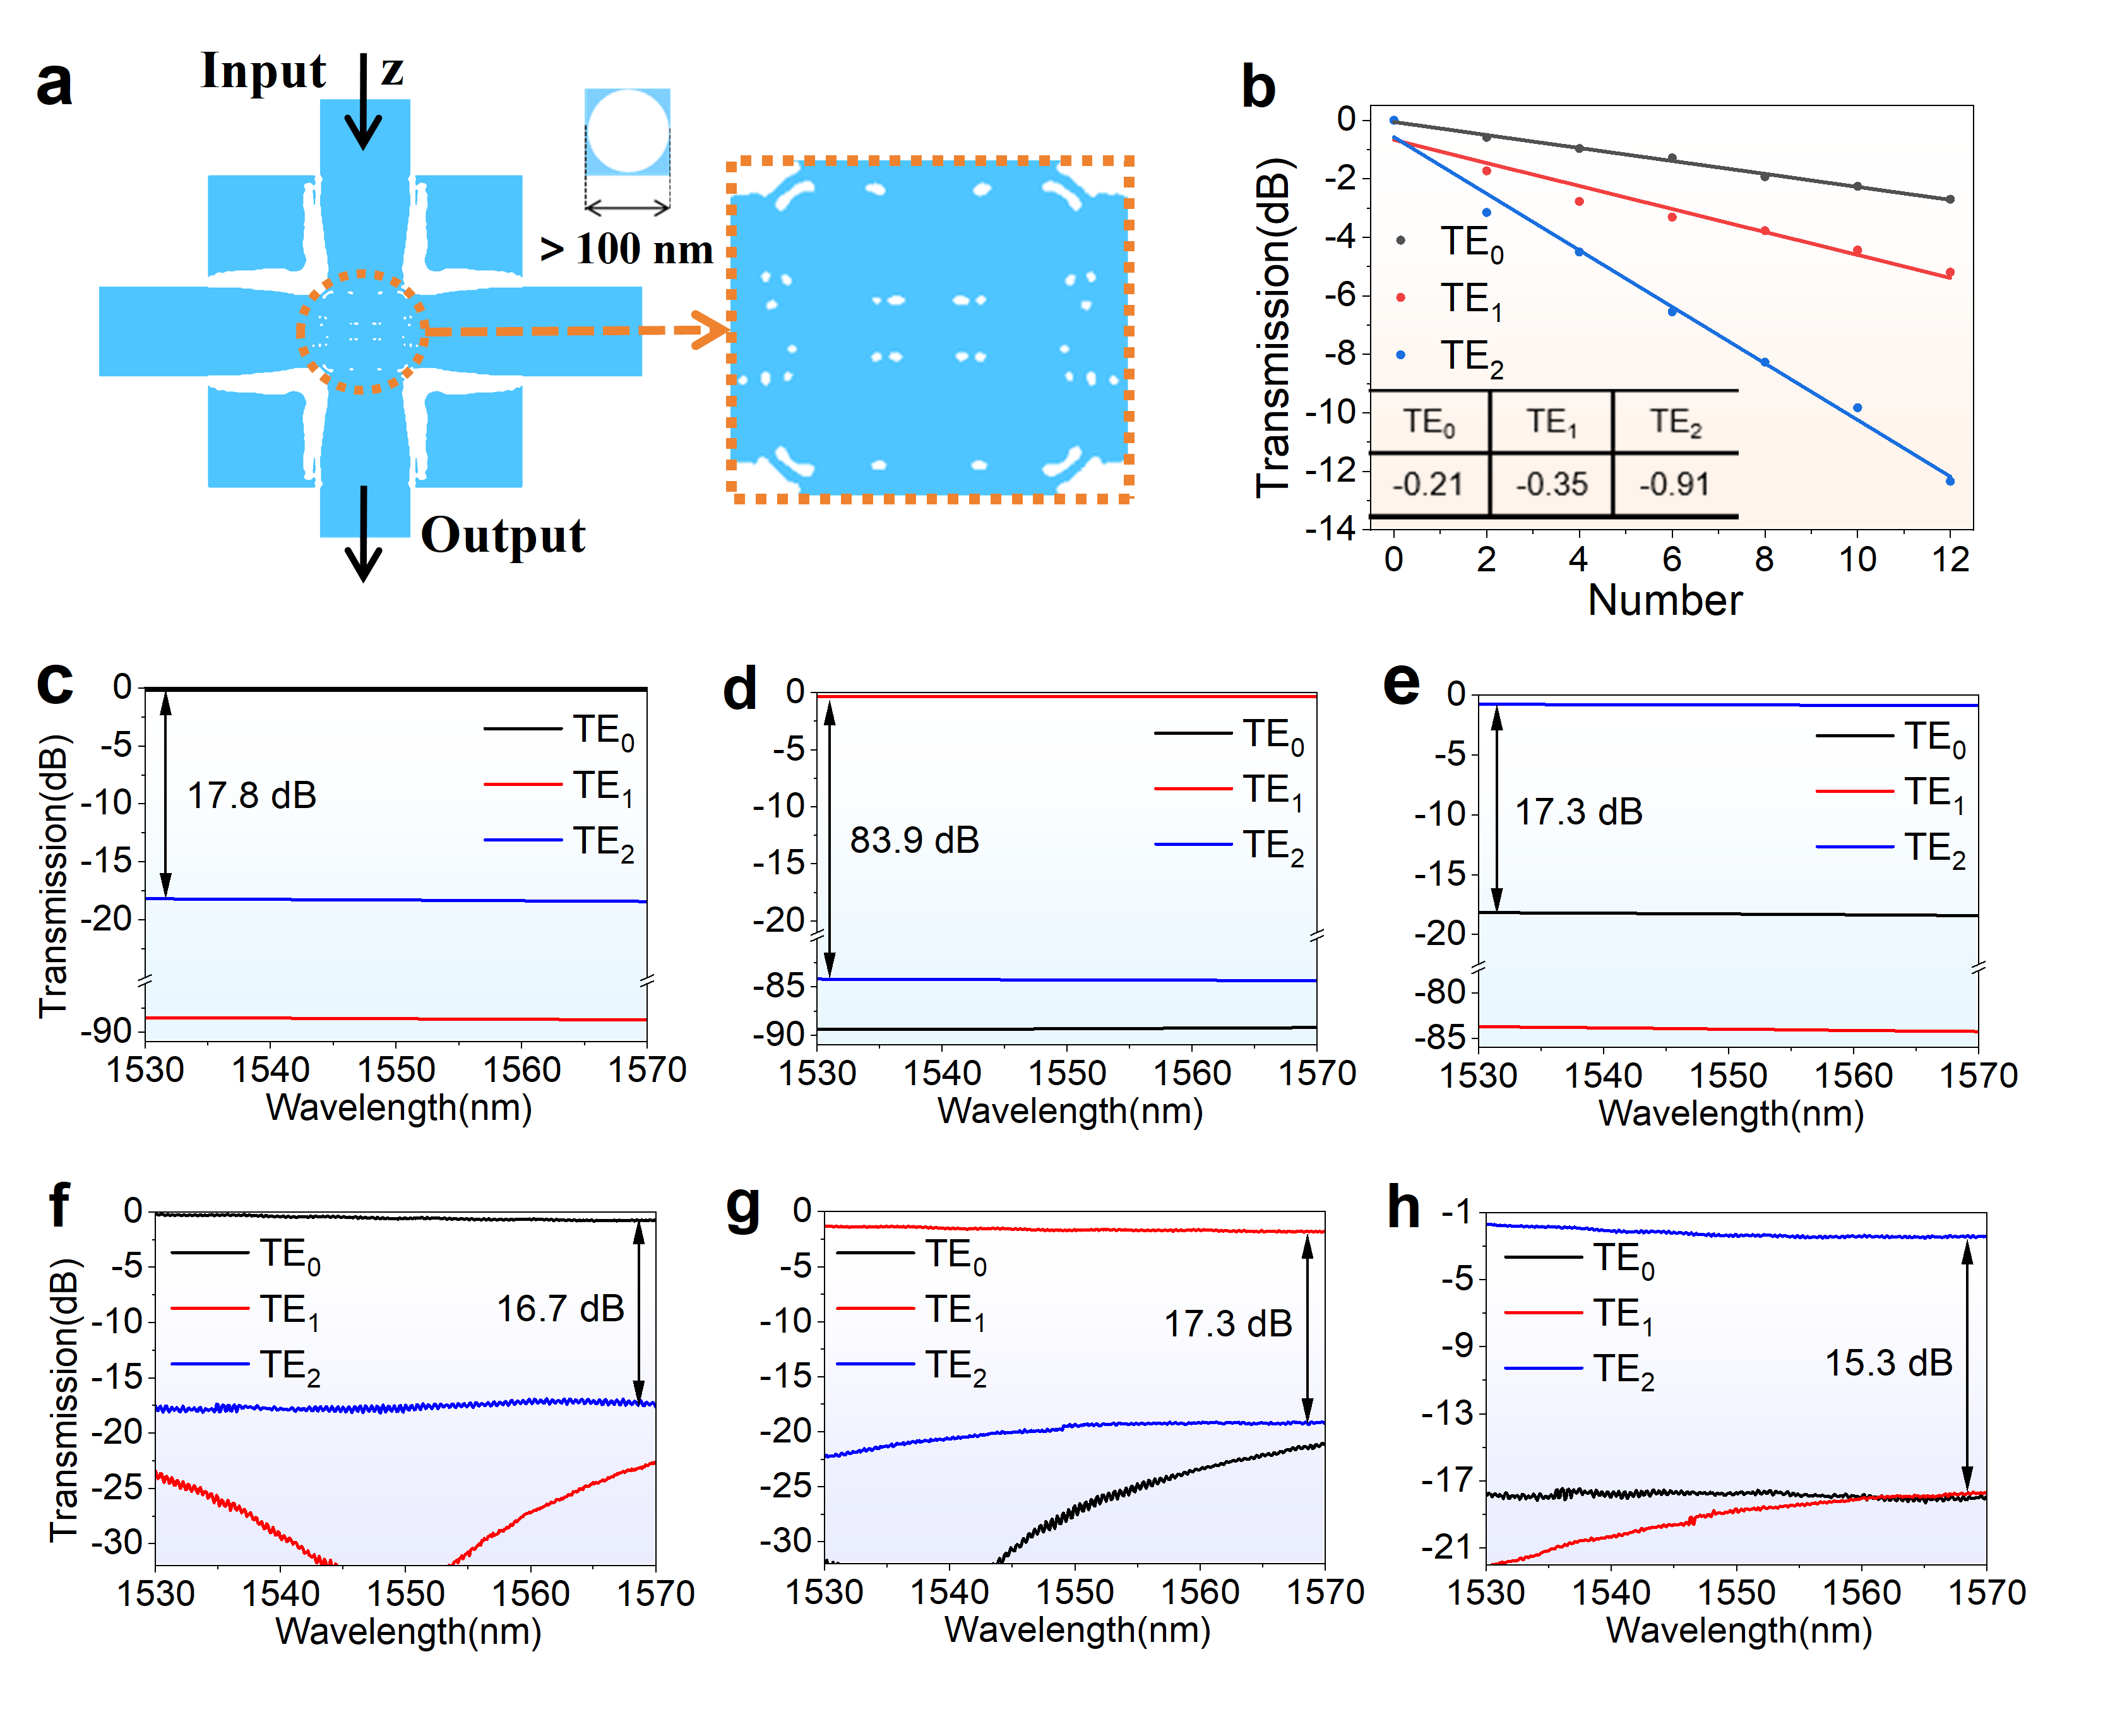


**Fig. S5** **Design and experimental demonstration of multimode waveguide crossing. a** Schematic diagram of Z-propagating case in the waveguide crossing. **b** Measured and fitted insertion losses of different modes. **c-e** Simulated transmission spectra of different mode channels at a wavelength range from 1530 nm to 1570 nm. **f-h** Measured transmission spectra of different mode channels at a wavelength range from 1530 nm to 1570 nm.

By considering the anisotropy of lithium niobate, we also characterize the waveguide crossing when light propagates along the crystallographic Z axis of lithium niobate. The schematic diagram of Z-propagating case is shown in **Fig. S5a**. As shown in **Fig. S5b**, the measured and fitted insertion losses of TE0, TE1, and TE2 modes are 0.21 dB, 0.35 dB, and 0.91 dB, at the wavelength of 1550 nm. In addition to the ultra-low insertion losses, the fabricated waveguide crossing is also demonstrated to have low inter-modal crosstalk in broadband. As shown in **Fig. S5c-e**, the simulated mode crosstalk for TE0, TE1, and TE2 mode channels is below -17.8 dB, -83.9 dB and -17.3 dB at a wavelength range from 1530 nm to 1570 nm. The corresponding measured results are shown in **Fig. S5f-h**, where the mode crosstalk is lower than -16.7 dB, -17.3 dB and -15.3 dB for TE0, TE1, and TE2 mode channels, respectively. Similarly, the crosstalk for TE1 mode is limited by the unexpected mode coupling in the auxiliary mode (de)multiplexers.

***S4. Inverse Design method***

We employ gradient optimization based on the adjoint method for inverse design. The algorithm updates the material distribution to maximize the optical figure of merit (FOM) under various constraints, and finally outputs a binary structure compatible with fabrication. The main design logic is illustrated in **Fig. S6**.


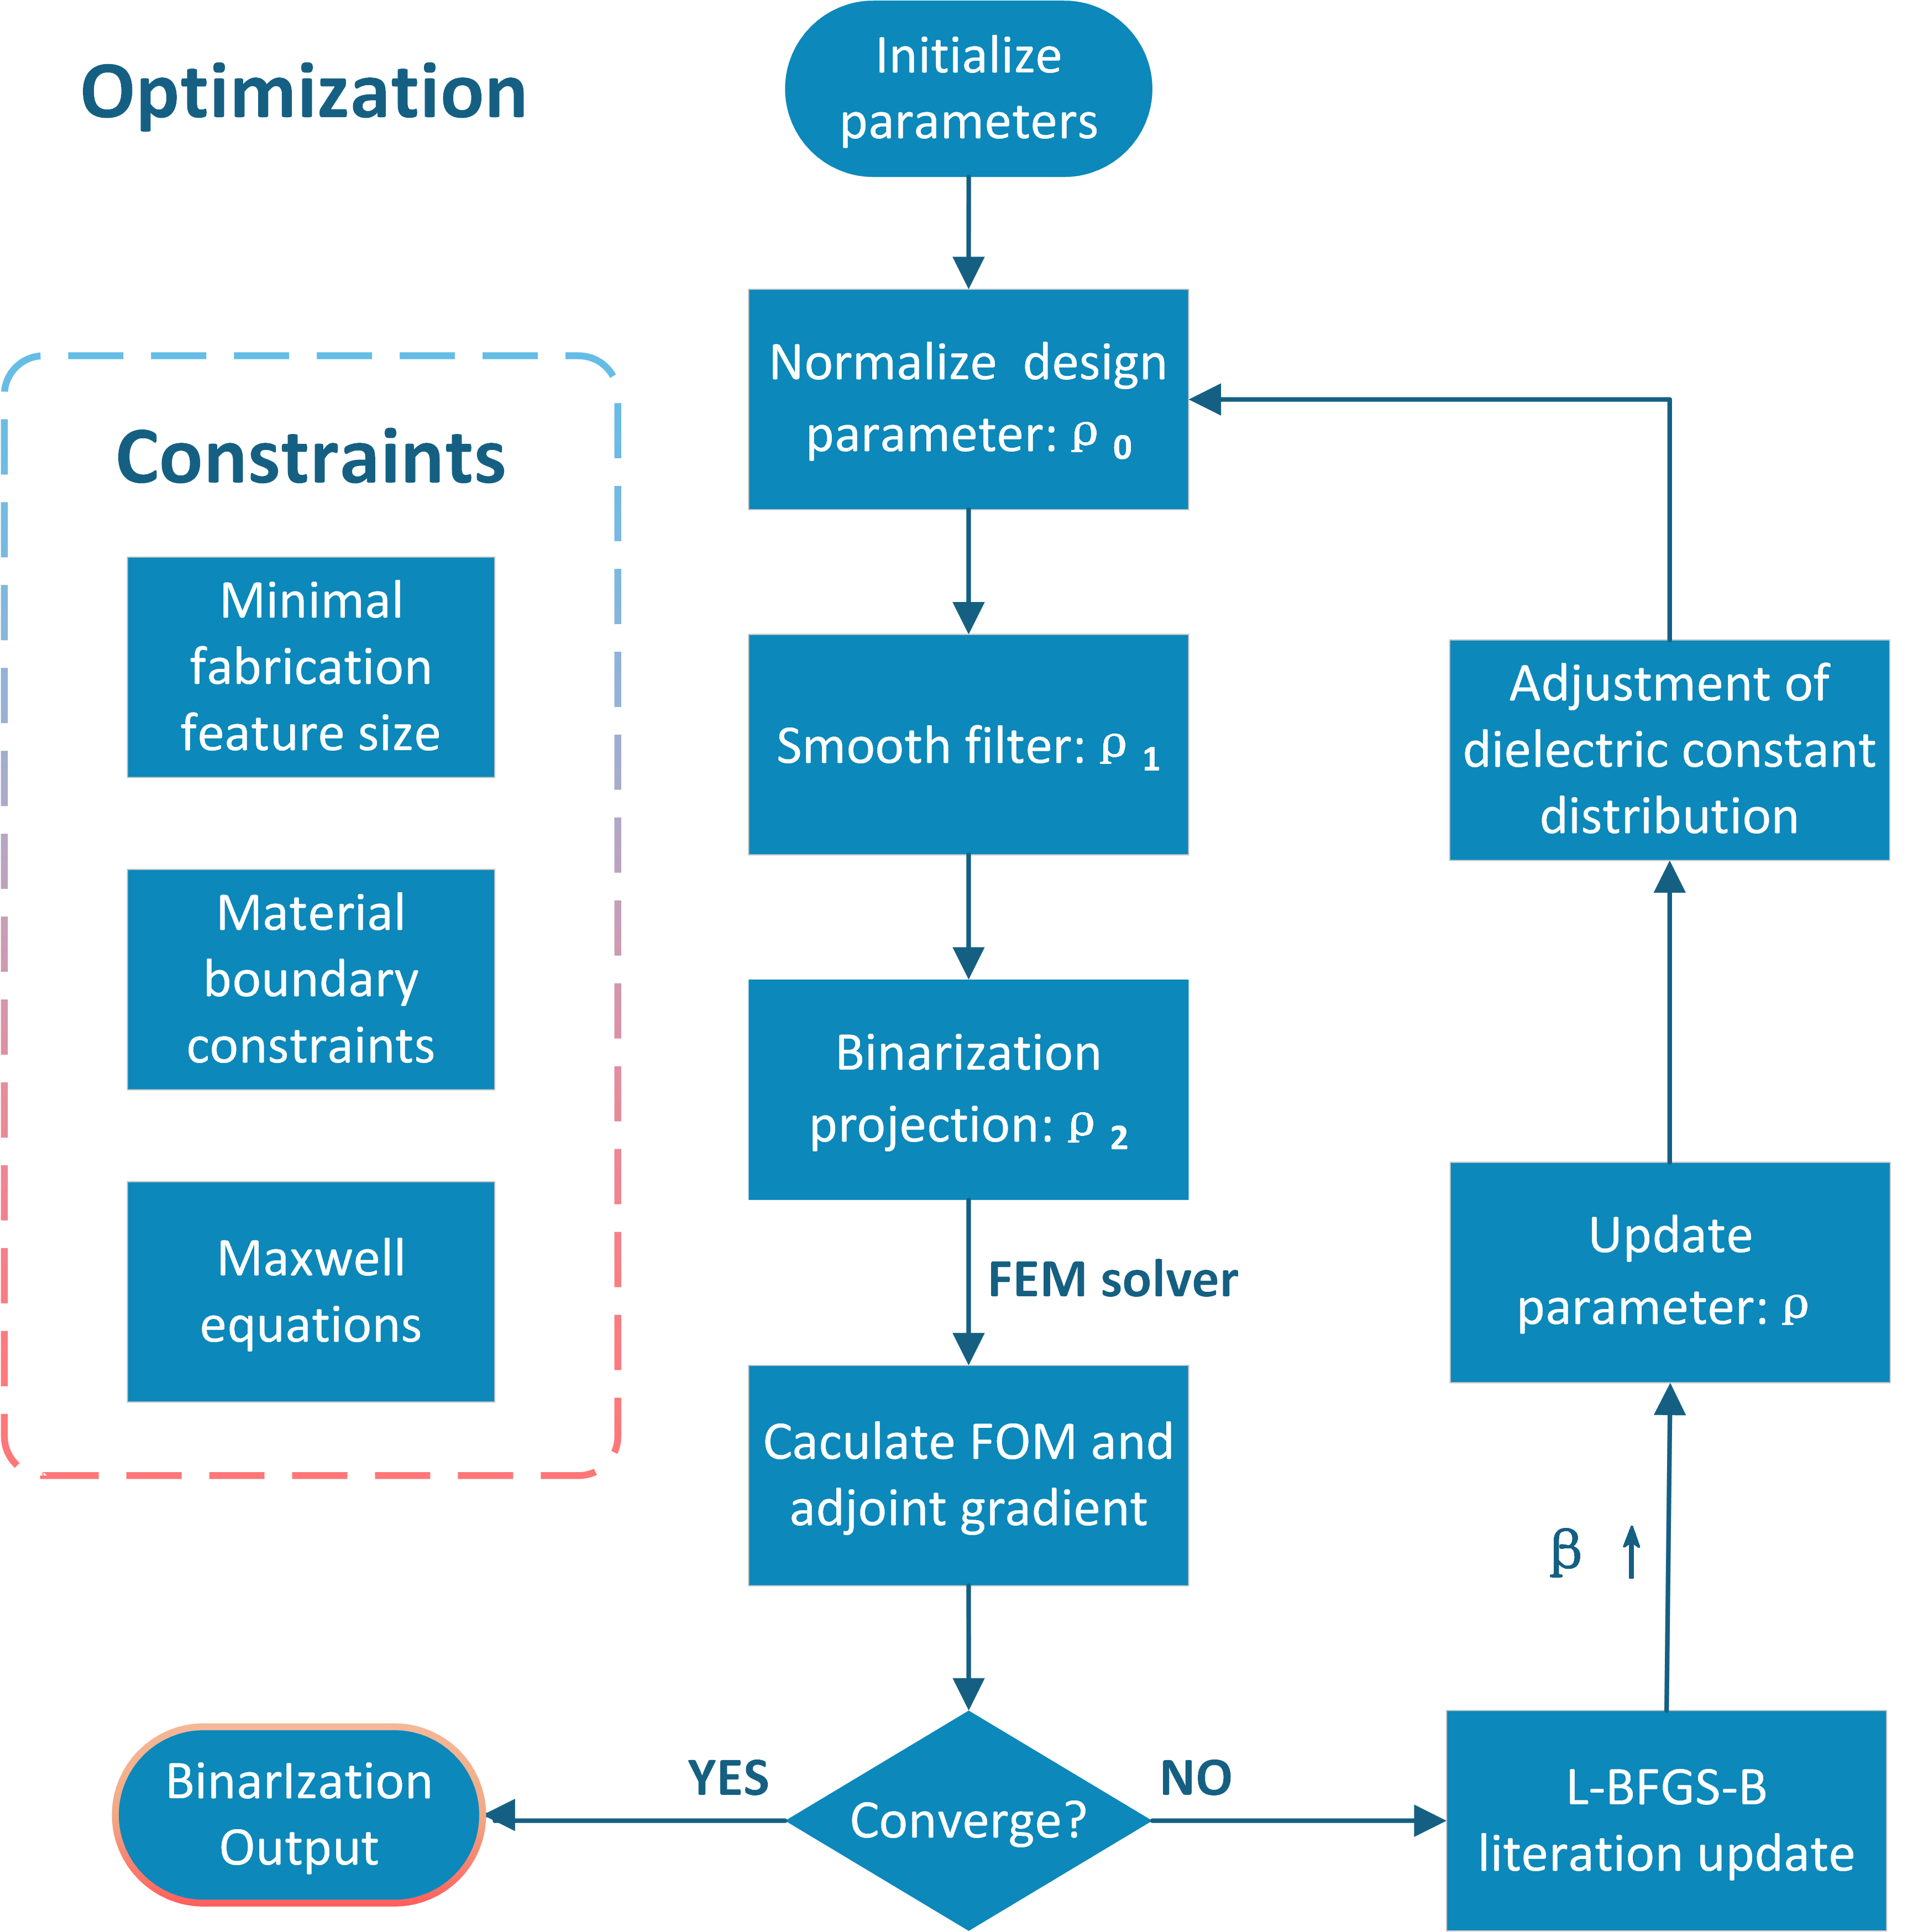


**Fig. S6 Main Workflow of Inverse Design Methodology**

The optimization process embeds physical constraints through a three-step parameter processing of design variables.

|  |  | (1) |
| --- | --- | --- |
|  |  | (2) |
|  |  | (3) |

The dielectric constant is first mapped to the [0,1] design space using material normalization formula (1), where and represent the dielectric constants of cladding and core materials, respectively. Subsequently, formula (2) with a top-hat convolution kernel smooths the material distribution, eliminating features such as sharp corners, small holes, and isolated structures. The kernel radius determines the minimum feature size. Finally, formula (3) with a Heaviside filter performs the binarization projection, where is the sharpness parameter and is design threshold. As the value of gradually increases, a smooth transition from continuous to discrete parameters is achieved, eventually pushing the dielectric constant values in the design region toward extreme values, and forming a binary distribution1.

During the design process, the device performance is quantitatively evaluated using the broadband optical figure of merit (FOM) formula (7):

|  |  | (7) |
| --- | --- | --- |

where) is the target forward transmission of light at wavelength , while is the actual forward transmission; and p is the generalized norm value. The update of the FOM is achieved via the adjoint method and gradient formula (8):

|  |  | (8) |
| --- | --- | --- |

where b denotes the input vector field, A is the stiffness matrix of the discretized Maxwell's equations, and V is the sensitivity of the FOM to the electric field. The adjoint field V is obtained through a single additional solve (9)2,3:

|  |  | (9) |
| --- | --- | --- |

Finally, the limited-memory quasi-Newton method (L-BFGS-B) is utilized to update design variables as shown in Eq. (10), whereis the quasi-Hessian matrix approximation,is the step size determined by line search,is the search direction vector, and is the gradient of FOM. Once the convergence conditions in Eq. (11) are satisfied, the final binarized structure will be output.

|  |  | (10) |
| --- | --- | --- |
|  |  | (11) |

Meanwhile, electromagnetic and physical constraints exist in the design. The design variables are input into the FEM solver, ensuring high-precision solutions to the frequency-domain Maxwell's equations (4):

|  |  | (4) |
| --- | --- | --- |
|  |  | (5) |
|  |  | (6) |

where is the vacuum permeability,is the relative permeability,is the vacuum permittivity,is the relative permittivity, is the electric field distribution, is the angular frequency, is the current density, and represents each frequency point of broadband light. Material boundary constraints in Eq. (5) ensure that the dielectric constant stays within the physically realizable range. Additional constraints in Eq. (6), such as the minimum-linewidth constraint and the minimum-linespacing constraint , ensure the feasibility of fabrication processes4.

***S5. Experiment setup***


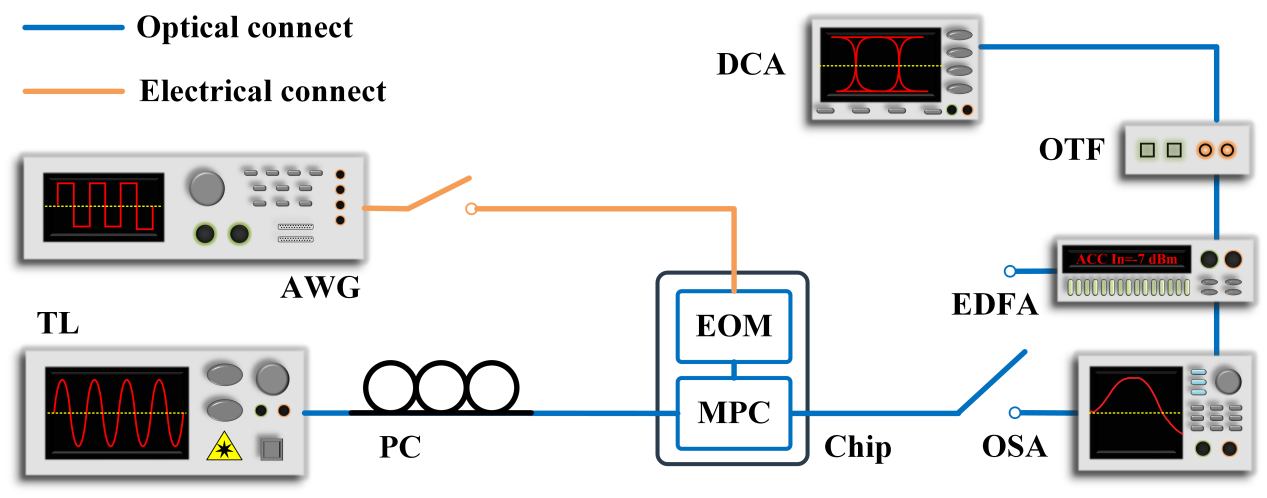


**Fig. S7 Schematic diagram of static and dynamic experimental setup.**

The experimental setup is shown in **Fig. S7**. The static experimental setup consists of a tunable laser (TL), a polarization controller (PC), the multimode photonic circuit (MPC) and an optical spectrum analyzer (OSA). In addition to the TL and PC, the dynamic experimental setup also consists of the on-chip electro-optic modulator (EOM), an arbitrary waveform generator (AWG), an erbium-doped fiber amplifier (EDFA), an optical tunable filter (OTF), and a digital communication analyzer (DCA).

***References***

1. Hammond, A., Oskooi, A., Johnson, S., & Ralph, S. Photonic topology optimization with semiconductor-foundry design-rule constraints. *Opt. Express* **29**, 23916-23938 (2021).
2. Lalau-Keraly, C.M., Bhargava, S., Miller, O., & Yablonovitch, E. Adjoint shape optimization applied to electromagnetic design. *Opt. Express* **21**, 21693-21701 (2013).
3. Lalau-Keraly, C.M. Optimizing Nanophotonics: from Photoreceivers to Waveguides. University of California, Berkeley (2016).
4. Zhou, M., Lazarov, B.S., Wang, F., & Sigmund, O. Minimum length scale in topology optimization by geometric constraints. *Comput. Methods Appl. Mech. Eng.* **293**, 266-282 (2015).
